# Supplementary material for: New Prospects for Improving Microspore Embryogenesis Induction in Highly Recalcitrant Winter Wheat Lines
Source: MDPI journal article supplement (doi:10.3390/plants13030363), 2024-01-25
Supplement: s1 [file s1]

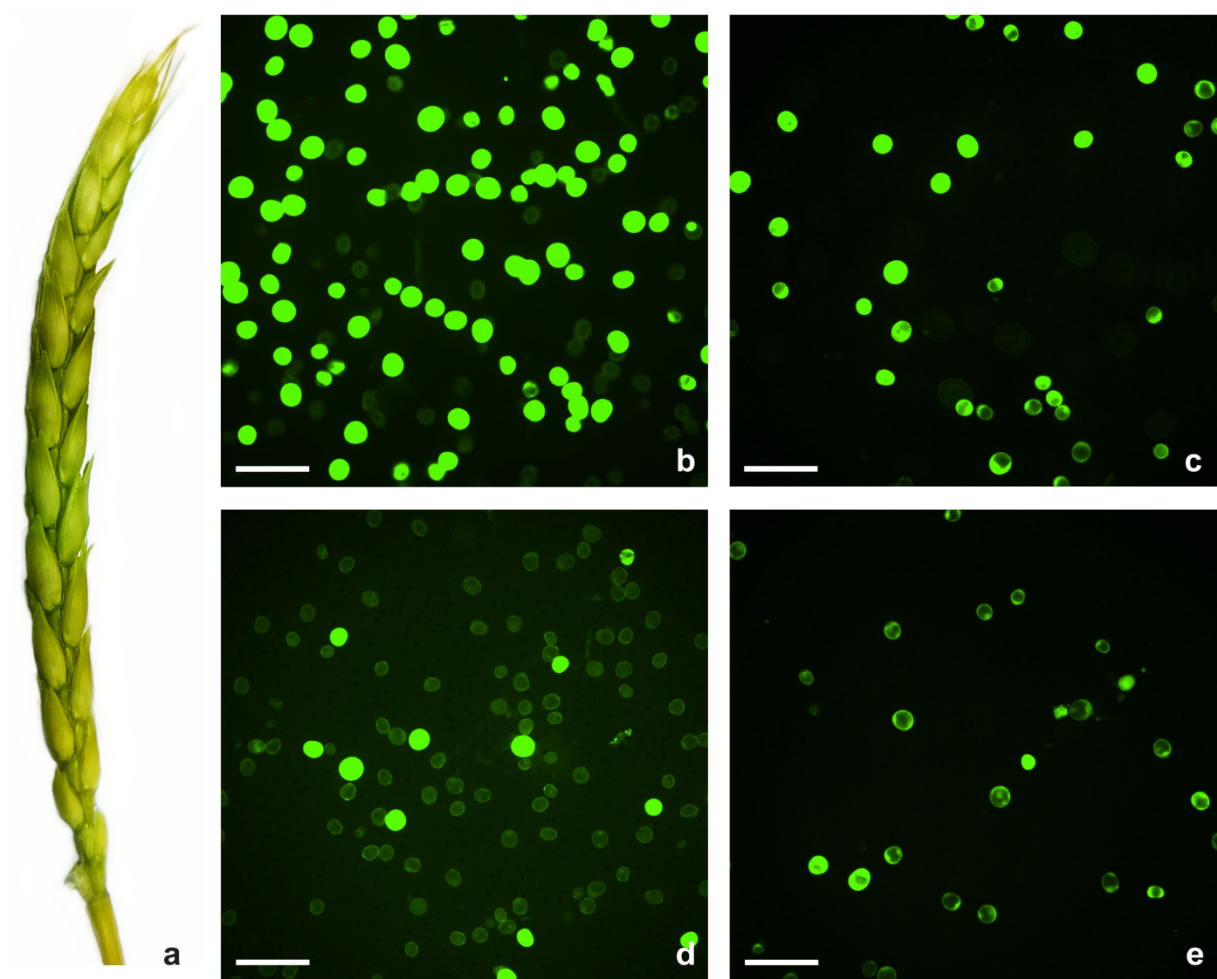

**Figure S1.** The effect of donor plant growth environment (controlled conditions compared to field-grown plants) on vitality of microspores isolated from spikes. Experiment 2020/2021. **(a)** Spike at the optimal phase for ME induction; **(b, c)** Microspores from plants grown under controlled conditions; **(d, e)** Microspores from field-grown plants. Microspores stained with FDA (fluorescence of vital cells intensely green). Bar = 200  $\mu\text{m}$ .

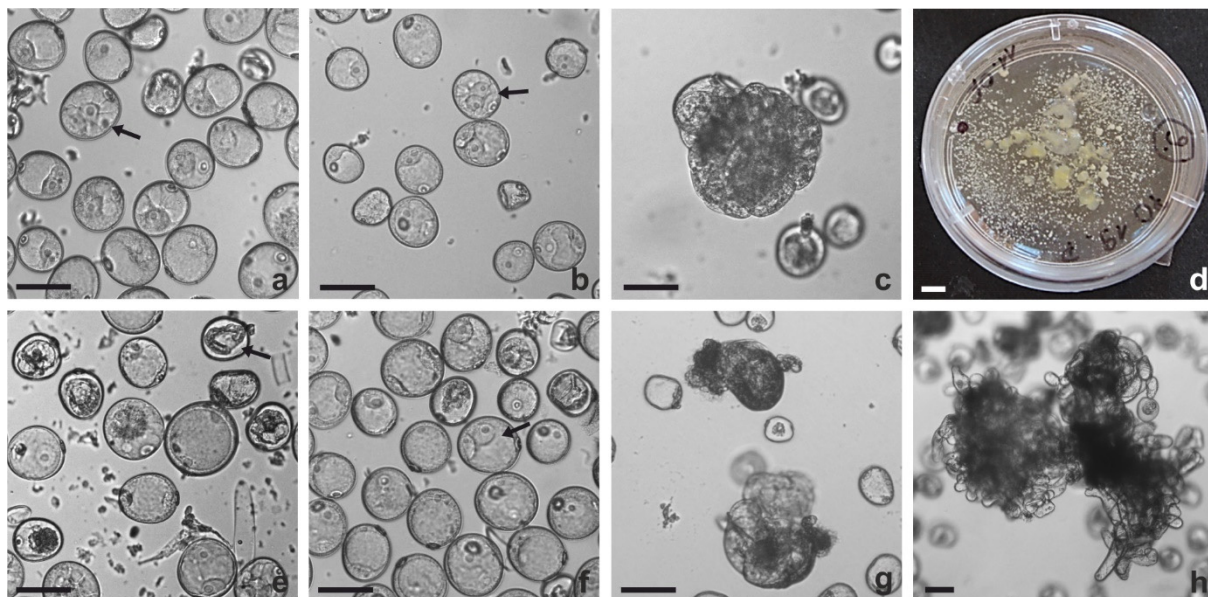

**Figure S2.** ME induction at 0, 14, 28 and 42d in suspension *in vitro* cultures of winter wheat (*Triticum aestivum* L.). **(a-d)** Properly developed embryo-like structures (ELS); **(e-h)** Suspension with low embryogenic potential to induce ELS with abnormalities.

**(a)** Microspores with star-like morphology (arrow points to SLS); **(b)** SLS after symmetric division (arrow); **(c)** Multicellular structure after 14d of culture; **(d)** Embryo-like structures (ELS) at the globular stage (0.5-1 mm in size) in co-culture with ovaries on Petri dish after 42 days of *in vitro* culture; **(e)** Microspore suspension after 14 days of culture (arrow points to dead microspore); **(f)** Microspores continuing gametophytic development in suspension; **(g)** Aborted multicellular structures; **(h)** Callus-like structure.

**(a, b, e, f)** Microspores suspensions on the day of isolation; **(c, g)** Microspore suspension after 14 days of culture; **(d)** Microspore suspension after 42 days of culture; **(h)** Microspore suspension after 28 days of culture; **(a-c, e-h)** Bar = 50  $\mu$ m; **(d)** Bar = 2 mm.

**Table S1.** Frequency of ME induction [ELS/spike] and green plant regeneration [GR/spike] in microspore cultures of winter wheat breeding lines of F1 and F4 generations. Experiment 2020/2021.

(\*) Data for field grown plants; ELS – embryo like structures; GR – green regenerants

| Wheat line | Experiment 2020/2021 |          |
|------------|----------------------|----------|
|            | ELS/spike            | GR/spike |
| CH1        | 0                    | –        |
| K20290     | 0.9                  | 0        |
| K393 F1    | 0                    | –        |
| SM IHAR    | 0                    | –        |
| MHR        | 0                    | –        |
| PO19 F4    | 16*                  | 0        |
| PO20       | 2.0                  | 0        |

(\*) Data for field grown plants; ELS – embryo like structures; GR – green regenerants

**Table S2.** Frequency of ME induction [ELS/100 A] and green plant regeneration [GR/100 A] in anther cultures of winter wheat breeding lines of F1 and F4 generations. Experiment 202/2021.

| Wheat line |    | Experiment 2020/2021 |                   |                    |                   |
|------------|----|----------------------|-------------------|--------------------|-------------------|
|            |    | ELS/100A             |                   | GR/100A            |                   |
|            |    | C17 <sub>Fic</sub>   | C17 <sub>Ph</sub> | C17 <sub>Fic</sub> | C17 <sub>Ph</sub> |
| CH1        | F1 | 0.7*                 | 0                 | 0                  | –                 |
| K20290     |    | 0.8*                 | 0                 | 0                  | –                 |
| K393       |    | 2.0*                 | 0                 | 0                  | –                 |
| SM IHAR    |    | 3.2*                 | 0                 | 0.8                | –                 |
| MHR        |    | 3.0*                 | 0                 | 2.0                | –                 |
| PO19       | F4 | 1.7*                 | 0                 | 0                  | –                 |
| PO20       |    | 2.8*                 | 0.2*              | 0.3                | 0                 |

(\*) Data for field grown plants; C17Fic - C17 induction medium supplemented with 50 g/dm<sup>3</sup> Ficoll 400; C17Ph - C17 induction medium supplemented with 2.5 g/dm<sup>3</sup> Phytigel

**Table S3.** Frequency of ME induction [ELS/spike] and green plant regeneration [GR/spike] in isolated microspore cultures of winter wheat breeding lines of F1 and F4 generations. Experiment 2021/2022.

| Wheat line |    | Experiment 2021/2022 |          |
|------------|----|----------------------|----------|
|            |    | ELS/spike            | GR/spike |
| CH1        |    | 0                    | –        |
| K20290     |    | 0                    | –        |
| K393       | F1 | 0.7                  | 0        |
| SM IHAR    |    | 0                    | –        |
| MHR        |    | 0                    | –        |
| PO19       | F4 | 0.1-0.7*             | 0.2      |
| PO20       |    | 0                    | –        |

(\*) Data for field grown plants; ELS – embryo like structures; GR – green regenerants.

**Table S4** Frequency of ME induction [ELS/100 A] and green plant regeneration [GR/100 A] in anther cultures of winter wheat breeding lines of F1 and F4 generations. Experiment 2021/2022.

| Wheat line |    | Experiment 2021/2022 |     |     |                   |     |     |                    |     |     |                   |     |     |
|------------|----|----------------------|-----|-----|-------------------|-----|-----|--------------------|-----|-----|-------------------|-----|-----|
|            |    | ELS/100A             |     |     |                   |     |     | GR/100A            |     |     |                   |     |     |
|            |    | C17 <sub>Fic</sub>   |     |     | C17 <sub>Ph</sub> |     |     | C17 <sub>Fic</sub> |     |     | C17 <sub>Ph</sub> |     |     |
|            |    | 10d                  | 20d | 30d | 10d               | 20d | 30d | 10d                | 20d | 30d | 10d               | 20d | 30d |
| CH1        | F1 | 2.0                  | 2.6 | 0.6 | 0.6               | 2.0 | 0   | 0                  | 0   | 0   | 0                 | 0   | –   |
| K20290     |    | 4.0                  | 2.6 | 0   | 0.6               | 2.0 | 0   | 2.0                | 0   | –   | 0                 | 0   | –   |
| K393       |    | 0                    | 0   | 0   | 0                 | 0   | 0   | –                  | –   | –   | –                 | –   | –   |
| SM IHAR    |    | 0.6                  | 0   | 0   | 0                 | 0   | 0   | 0.6                | –   | –   | –                 | –   | –   |
| MHR        |    | 2.0                  | 0   | 0   | 0.6               | 0   | 0   | 0                  | –   | –   | 0                 | –   | –   |
| PO19       | F4 | 3.4                  | 0.6 | 0   | 0                 | 0   | 0   | 0                  | 0   | –   | –                 | –   | –   |
| PO20       |    | 2.0                  | 0.6 | 0   | 0                 | 0   | 0   | 0                  | 0   | –   | –                 | –   | –   |

C17Fic- C17 induction medium supplemented with 50 g/dm<sup>3</sup> Ficoll 400; C17Ph - C17 induction medium solidified with 2.5 g/dm<sup>3</sup> Phytigel; 10d, 20d, 30d – Low temperature tillers pre-treatment for 10, 20 or 30 days at 4°C; A – anthers; ELS – embryo like structures; GR – green regenerants
